# Supplementary material for: Long-Term Outcomes after Dialysis-Requiring Acute Kidney Injury
Source: Hindawi journal article supplement (doi:10.1155/2014/365186), 2014-01-01
Supplement: f1 [file 365186.f1.pdf]

## Supplementary File

**Table S1.** Demographics and comorbidities added into a non-parsimonious propensity model to predict dialysis at 90 days after hospital discharge.

|                                      | HR    | lower 95%<br>CI | upper<br>95% CI | P      |
|--------------------------------------|-------|-----------------|-----------------|--------|
| Age ( per year)                      | 0.99  | 0.98            | 0.99            | <0.001 |
| <b>Baseline comorbidities</b>        |       |                 |                 |        |
| Chronic kidney disease               | 27.38 | 23.32           | 32.15           | <0.001 |
| Diabetics mellitus                   | 0.47  | 0.38            | 0.59            | <0.001 |
| Diabetics with microvascular disease | 1.43  | 1.19            | 1.72            | <0.001 |
| Metabolic disease                    | 3.04  | 1.73            | 5.32            | <0.001 |
| Mechanical ventilation               | 0.61  | 0.46            | 0.82            | 0.001  |
| Tumor with metastasis                | 0.40  | 0.21            | 0.76            | 0.005  |
| COPD                                 | 0.80  | 0.64            | 0.99            | 0.037  |
| <b>Operative categories</b>          |       |                 |                 |        |
| Hepatobiliary                        | 0.21  | 0.07            | 0.65            | 0.007  |
| Cardiothoracic                       | 0.38  | 0.20            | 0.70            | 0.002  |
| Upper GI                             | 0.29  | 0.08            | 1.11            | 0.071  |
| <b>Index hospital comorbidities</b>  |       |                 |                 |        |

|                                                |      |      |      |        |
|------------------------------------------------|------|------|------|--------|
| Hematologic                                    | 2.54 | 1.07 | 6.04 | 0.035  |
| <b>Post discharge medication during survey</b> |      |      |      |        |
| NSAID                                          | 0.77 | 0.63 | 0.95 | 0.015  |
| ACEI/ARB                                       | 1.46 | 1.21 | 1.77 | <0.001 |
| Diuretics                                      | 0.81 | 0.67 | 0.99 | 0.037  |

Adjusted generalized  $R^2 = 0.588$ ,

**Abbreviations,**

ACEI, angiotensin-converting-enzyme inhibitor; AKI, acute kidney injury; ARB, Angiotensin II receptor blockers; COPD, chronic obstructive pulmonary disease; ESRD, end stage renal disease; GI, Gastrointestinal; NSAID, nonsteroidal anti-inflammatory agents/analgesics.

**Table S2a** Propensity matched of baseline characteristics and clinical endpoints between patient without AKI or dialysis and recovery from AKI-dialysis.

|                       | Non-AKI (n=231) | Recoverable subgroup (n=231) | p     |
|-----------------------|-----------------|------------------------------|-------|
| Male                  | 133(57.6%)      | 126(54.5%)                   | 0.574 |
| Age (years)           | 62.6±15.3       | 63.1±15.8                    | 0.531 |
| <b>Comorbidities</b>  |                 |                              |       |
| Charlson score        | 2.81±2.42       | 3±2.33                       | 0.256 |
| Myocardial infarction | 9(3.9%)         | 8(3.5%)                      | 0.999 |

|                                             |            |            |       |
|---------------------------------------------|------------|------------|-------|
| <b>Congestive heart failure</b>             | 38(16.5%)  | 36(15.6%)  | 0.899 |
| <b>Peripheral vascular disease</b>          | 10(4.3%)   | 8(3.5%)    | 0.811 |
| <b>Cerebrovascular disease</b>              | 38(16.5%)  | 40(17.3%)  | 0.901 |
| <b>Dementia</b>                             | 9(3.9%)    | 12(5.2%)   | 0.656 |
| <b>COPD</b>                                 | 47(20.3%)  | 44(19%)    | 0.815 |
| <b>Rheumatologic disease</b>                | 6(2.6%)    | 6(2.6%)    | 0.999 |
| <b>Hemiplegia</b>                           | 5(2.2%)    | 3(1.3%)    | 0.724 |
| <b>Solid tumor</b>                          | 11(4.8%)   | 15(6.5%)   | 0.546 |
| <b>Tumor with metastatic</b>                | 4(1.7%)    | 5(2.2%)    | 0.999 |
| <b>AIDS</b>                                 |            |            |       |
| <b>Diabetes Mellitus</b>                    | 126(54.5%) | 120(51.9%) | 0.641 |
| <b>Diabetics with microvascular disease</b> | 57(24.7%)  | 68(29.4%)  | 0.295 |
| <b>Liver disease</b>                        |            |            |       |
| <b>Moderate or Severe liver disease</b>     | 21(9.1%)   | 20(8.7%)   | 0.999 |
| <b>Chronic Kidney disease</b>               | 104(45%)   | 107(46.3%) | 0.852 |
| <b><i>Index hospital comorbidity</i></b>    |            |            |       |
| <b>Cardiovascular</b>                       | 16(6.9%)   | 15(6.5%)   | 0.999 |
| <b>Respiratory</b>                          | 41(17.7%)  | 42(18.2%)  | 0.999 |
| <b>Renal</b>                                | 2(0.9%)    | 2(0.9%)    | 0.999 |
| <b>Hepatic</b>                              | 3(1.3%)    | 1(0.4%)    | 0.623 |
| <b>Neurologic</b>                           | 5(2.2%)    | 4(1.7%)    | 0.999 |
| <b>Hematologic</b>                          | 0(0%)      | 1(0.4%)    | 0.999 |

|                                                        |            |            |       |
|--------------------------------------------------------|------------|------------|-------|
| <b>Metabolic</b>                                       | 1(0.4%)    | 1(0.4%)    | 0.999 |
| <b><i>Operative categories</i></b>                     |            |            |       |
| <b>Cardio-thorathic</b>                                | 16(6.9%)   | 12(5.2%)   | 0.559 |
| <b>Upper GI</b>                                        | 2(0.9%)    | 1(0.4%)    | 0.999 |
| <b>Lower GI</b>                                        | 3(1.3%)    | 4(1.7%)    | 0.999 |
| <b>Hepatobiliary</b>                                   | 2(0.9%)    | 1(0.4%)    | 0.999 |
| <b>Mechanical ventilation</b>                          | 19(8.2%)   | 18(7.8%)   | 0.999 |
| <b>ICU admission during index hospitalization</b>      | 120(51.9%) | 116(50.2%) | 0.780 |
| <b><i>Post discharge medications during survey</i></b> |            |            |       |
| <b>ACEI/ARB</b>                                        | 45(19.5%)  | 42(18.2%)  | 0.812 |
| <b>Statin</b>                                          | 16(6.9%)   | 21(9.1%)   | 0.493 |
| <b>NSAID</b>                                           | 37(16%)    | 30(13%)    | 0.428 |
| <b>Aspirin</b>                                         | 14(6.1%)   | 18(7.8%)   | 0.583 |
| <b>Diuretics</b>                                       | 78(33.8%)  | 74(32%)    | 0.767 |

ACEI, angiotensin-converting-enzyme inhibitor; AKI, acute kidney injury; ARB, Angiotensin II receptor blockers; COPD, chronic obstructive pulmonary disease; ESRD, end stage renal disease; GI, Gastrointestinal; ICU, intensive care unit; MACE, major adverse cardiovascular events; NSAID, nonsteroidal anti-inflammatory agents/analgesics.

**Table S2b** Propensity matched of baseline characteristics and clinical endpoints between patient with or without recovery from AKI-dialysis.

|                                             | <i>Non recoverable subgroup</i><br>(n=543) | <i>Recoverable subgroup</i><br>(n=543) | <b>p</b> |
|---------------------------------------------|--------------------------------------------|----------------------------------------|----------|
| <b>Male</b>                                 | 286(52.7%)                                 | 298(54.9%)                             | 0.503    |
| <b>Age (years)</b>                          | 62.7±15.5                                  | 63.6±15.8                              | 0.314    |
| <b>Comorbidity</b>                          |                                            |                                        |          |
| <b>Charlson score</b>                       | 3.4±2.42                                   | 3.37±2.42                              | 0.749    |
| <b>Myocardial infarction</b>                | 15(2.8%)                                   | 20(3.7%)                               | 0.492    |
| <b>Congestive heart failure</b>             | 107(19.7%)                                 | 107(19.7%)                             | 0.999    |
| <b>Peripheral vascular disease</b>          | 24(4.4%)                                   | 22(4.1%)                               | 0.880    |
| <b>Cerebrovascular disease</b>              | 84(15.5%)                                  | 97(17.9%)                              | 0.329    |
| <b>Dementia</b>                             | 19(3.5%)                                   | 25(4.6%)                               | 0.442    |
| <b>COPD</b>                                 | 112(20.6%)                                 | 98(18%)                                | 0.318    |
| <b>Rheumatologic disease</b>                | 11(2%)                                     | 13(2.4%)                               | 0.837    |
| <b>Hemiplegia</b>                           | 12(2.2%)                                   | 15(2.8%)                               | 0.697    |
| <b>Solid tumor</b>                          | 36(6.6%)                                   | 40(7.4%)                               | 0.721    |
| <b>Tumor with metastatic</b>                | 13(2.4%)                                   | 12(2.2%)                               | 0.999    |
| <b>Diabetic Mellitus</b>                    | 289(53.2%)                                 | 289(53.2%)                             | 0.999    |
| <b>Diabetics with microvascular disease</b> | 195(35.9%)                                 | 184(33.9%)                             | 0.524    |
| <b>Liver disease</b>                        |                                            |                                        |          |

|                                            |            |            |       |
|--------------------------------------------|------------|------------|-------|
| Moderate or Severe liver disease           | 56(10.3%)  | 57(10.5%)  | 0.999 |
| Chronic Kidney disease                     | 313(57.6%) | 304(56%)   | 0.624 |
| <i>Index hospital comorbidity</i>          |            |            |       |
| Cardiovascular                             | 22(4.1%)   | 24(4.4%)   | 0.880 |
| Respiratory                                | 74(13.6%)  | 94(17.3%)  | 0.111 |
| Renal                                      | 290(53.4%) | 292(53.8%) | 0.952 |
| Hepatic                                    | 11(2%)     | 10(1.8%)   | 0.999 |
| Neurologic                                 | 9(1.7%)    | 10(1.8%)   | 0.999 |
| Hematologic                                | 3(0.6%)    | 3(0.6%)    | 0.999 |
| Metabolic                                  | 23(4.2%)   | 24(4.4%)   | 0.999 |
| <i>Operative categories</i>                |            |            |       |
| Cardiothoracic                             | 13(2.4%)   | 9(1.7%)    | 0.519 |
| Upper GI                                   | 2(0.4%)    | 4(0.7%)    | 0.687 |
| Lower GI                                   | 3(0.6%)    | 8(1.5%)    | 0.224 |
| Hepatobiliary                              | 2(0.4%)    | 4(0.7%)    | 0.687 |
| Mechanical ventilation                     | 41(7.6%)   | 39(7.2%)   | 0.908 |
| ICU admission during index hospitalization | 281(51.7%) | 264(48.6%) | 0.336 |
| <i>Post discharge medications</i>          |            |            |       |
| ACEI/ARB                                   | 149(27.4%) | 140(25.8%) | 0.583 |
| Statin                                     | 59(10.9%)  | 50(9.2%)   | 0.419 |
| NSAID                                      | 90(16.6%)  | 82(15.1%)  | 0.561 |

|                  |            |            |       |
|------------------|------------|------------|-------|
| <b>Aspirin</b>   | 42(7.7%)   | 39(7.2%)   | 0.817 |
| <b>Diuretics</b> | 205(37.8%) | 192(35.4%) | 0.450 |

---

ACEI, angiotensin-converting-enzyme inhibitor; AKI, acute kidney injury; ARB, Angiotensin II receptor blockers; COPD, chronic obstructive pulmonary disease; ESRD, end stage renal disease; GI, Gastrointestinal; ICU, intensive care unit; MACE, major adverse cardiovascular events; NSAID, nonsteroidal anti-inflammatory agents/analgesics.

**Table S3**

Risk of long-term mortality using the critical NSARF database by Cox proportional hazard model. (Abbreviations; AKI, acute kidney injury; DM, diabetics mellitus; CI, confidence interval; CKD, chronic kidney disease; CHF, congestive heart failure; HR, hazard ratio)

|                                                         | HR   | lower 95%<br>CI | upper 95%<br>CI | P      |
|---------------------------------------------------------|------|-----------------|-----------------|--------|
| <b>Age ( per year)</b>                                  | 1.03 | 1.03            | 1.03            | <0.001 |
| <b>Sex</b>                                              | 1.30 | 1.19            | 1.41            | <0.001 |
| <b>Charlson</b>                                         | 1.13 | 1.12            | 1.14            | <0.001 |
| <b>CKD</b>                                              | 1.47 | 1.23            | 1.75            | <0.001 |
| <b>Non-AKI vs. Dialysis withdrawal subgroup</b>         | 0.69 | 0.54            | 0.87            | 0.002  |
| <b>Non- withdrawal vs. Dialysis withdrawal subgroup</b> | 1.64 | 1.05            | 2.56            | 0.031  |
| <b>HTN</b>                                              | 0.74 | 0.67            | 0.80            | <0.001 |
| <b>Moderate Severe liver disease</b>                    | 1.14 | 0.85            | 1.52            | 0.377  |
| <b>Mild liver disease</b>                               | 1.13 | 0.86            | 1.49            | 0.381  |
| <b>CHF</b>                                              | 1.48 | 1.31            | 1.68            | <0.001 |
| <b>DM</b>                                               | 1.11 | 1.01            | 1.22            | 0.031  |

Adjusted generalized  $R^2$  =0.211, C- index= 0.76
